# Supplementary material for: The CREB coactivator CRTC2 promotes oncogenesis in LKB1-mutant non–small cell lung cancer
Source: PubMed Central journal article supplement — Sci Adv. 2019 Jul 24;5(7):eaaw6455. doi: 10.1126/sciadv.aaw6455 (PMC6656544; doi:10.1126/sciadv.aaw6455), 2019-07-24
Supplement: aaw6455_SM.pdf [file aaw6455_SM.pdf]

## Supplementary Materials for

### **The CREB coactivator CRTC2 promotes oncogenesis in LKB1-mutant non–small cell lung cancer**

Laura Rodón, Robert U. Svensson, Ezra Wiater, Matthew G. H Chun, Wen-Wei Tsai, Lillian J. Eichner, Reuben J. Shaw, Marc Montminy\*

\*Corresponding author. Email: [montminy@salk.edu](mailto:montminy@salk.edu)

Published 24 July 2019, *Sci. Adv.* **5**, eaaw6455 (2019)  
DOI: 10.1126/sciadv.aaw6455

#### **This PDF file includes:**

- Fig. S1. mRNA expression and incidence of CRTC alterations in NSCLC.
- Fig. S2. LKB1 down-regulates the expression of CREB target genes.
- Fig. S3. CRTC2 promotes anchorage-independent growth in NSCLC cells.
- Fig. S4. Genes regulated by LKB1 at the mRNA level that show LKB1-regulated binding of CRTC2 to their promoters in NSCLC.
- Fig. S5. ID1 expression is regulated by CRTC2 and promotes anchorage-independent growth in NSCLC cells.
- Fig. S6. Genes and molecular functions regulated by ID1 in NSCLC cells.

**A**

| Cell line | mRNA expression(RPKM) |        |       |
|-----------|-----------------------|--------|-------|
|           | CRTC1                 | CRTC2  | CRTC3 |
| A427      | 1.308                 | 17.519 | 5.104 |
| A549      | 1.317                 | 10.992 | 6.537 |
| H1299     | 1.372                 | 18.479 | 3.489 |
| H1355     | 2.775                 | 16.59  | 6.146 |
| H157      | 0.646                 | 9.257  | 6.186 |
| H23       | 1.956                 | 45.689 | 2.858 |
| H358      | 1.387                 | 15.757 | 3.29  |
| H460      | 1.708                 | 14.75  | 6.228 |

**B**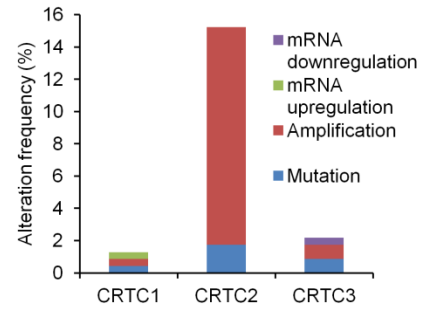

**Fig. S1. mRNA expression and incidence of CRTC alterations in NSCLC. (A)** Expression of CRTC1, CRTC2, and CRTC3 mRNA in a panel of NSCLC cell lines (n= 8). **(B)** Incidence of CRTC alterations in a panel of lung adenocarcinoma patient samples (n=230) from the TCGA.

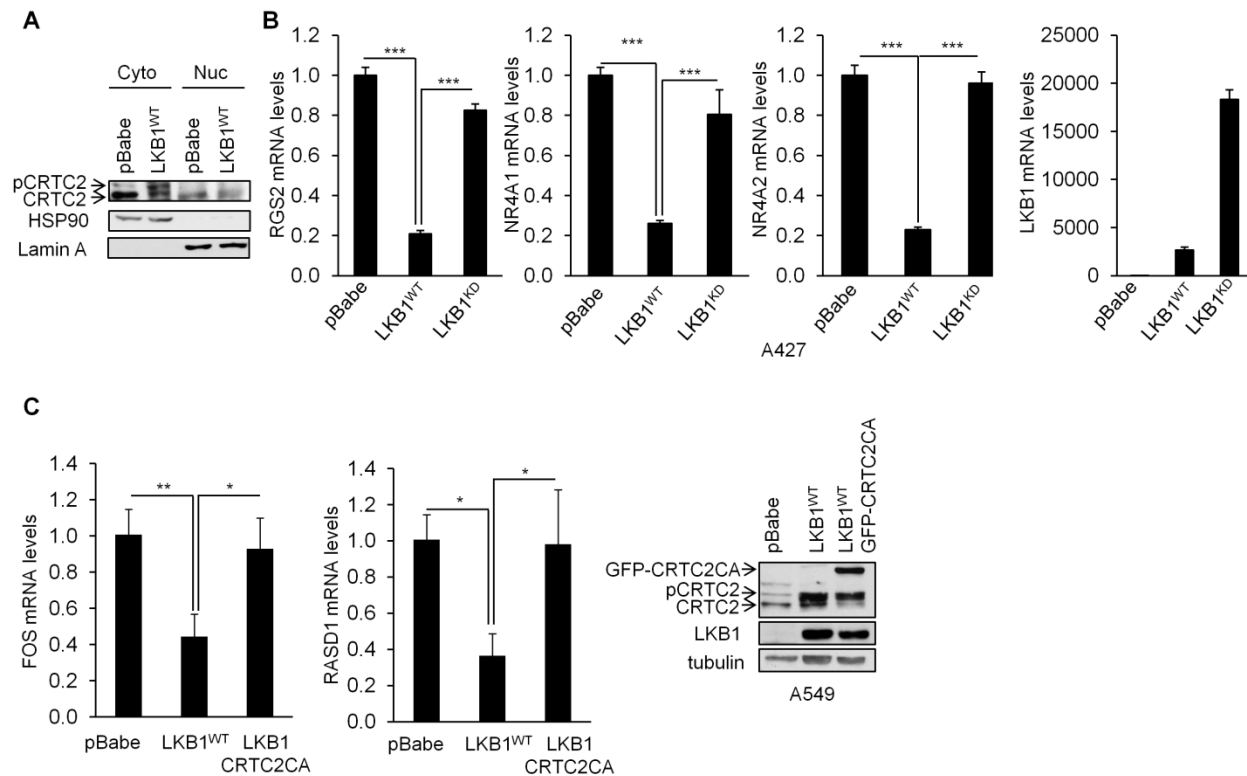

**Fig. S2. LKB1 down-regulates the expression of CREB target genes.** (A) Western blot analysis in nuclear and cytoplasmic fractions of A549 cells expressing the pBabe vector or full-length LKB1 (LKB1<sup>WT</sup>). (B) RGS2, NR4A1, NR4A2, and LKB1 mRNA levels in A427 cells expressing the pBabe vector, full-length LKB1 (LKB1<sup>WT</sup>) or kinase-dead LKB1 (LKB1<sup>KD</sup>). All values are expressed as means  $\pm$  s.d. \*  $P < 0.05$  \*\*  $P < 0.01$  \*\*\*  $P < 0.001$  determined by ANOVA with Tukeys method. (C) Immunoblot and qRT-PCR analysis in A549 cells expressing the pBabe vector, full-length LKB1 (LKB1<sup>WT</sup>) and/or phosphorylation-defective CRTC2 (GFP-CRTC2CA). All values are expressed as means  $\pm$  s.d. \*  $P < 0.05$  \*\*  $P < 0.01$  \*\*\*  $P < 0.001$  determined by ANOVA with Tukeys method.

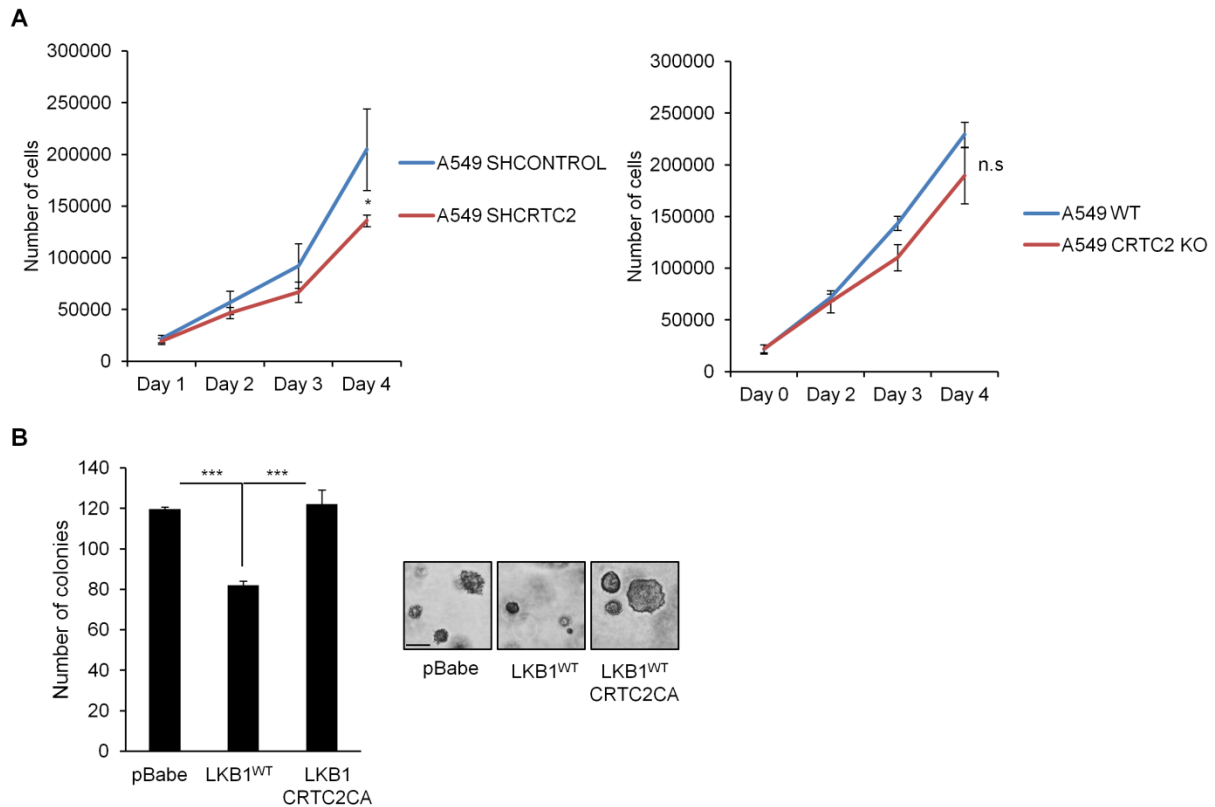

**Fig. S3. CRTC2 promotes anchorage-independent growth in NSCLC cells.** (A) Cellular proliferation in A549 shcontrol, A549 shCRTC2, A549 wild-type (WT) and A549 CRTC2-KO cells. All values are expressed as means  $\pm$  s.d. \*  $P < 0.05$  \*\*  $P < 0.01$  \*\*\*  $P < 0.001$  determined by two-sided student t-test. (B) Anchorage-independent growth assessed by soft agar assay in A549 cells expressing the pBabe vector, full-length LKB1 (LKB1<sup>WT</sup>) and/or phosphorylation-defective CRTC2 (GFP-CRTC2CA). All values are expressed as means  $\pm$  s.d. \*  $P < 0.05$  \*\*  $P < 0.01$  \*\*\*  $P < 0.001$  determined by ANOVA with Tukeys method. Representative images are shown. Scale bar=100  $\mu$ m.

| gene_id      | log ratio A549<br>LKB1/control (RNAseq) | log ratio CRTC2 binding A549<br>LKB1/control (ChIPseq) | log ratio CREB binding A549<br>LKB1/control (ChIPseq) | CRE site under the peak<br>(ChIPseq) | log ratio LKB1 mutant/control lung<br>adenocarcinoma TCGA (RNAseq) | q-VALUE         |
|--------------|-----------------------------------------|--------------------------------------------------------|-------------------------------------------------------|--------------------------------------|--------------------------------------------------------------------|-----------------|
| CYP1B1       | -4.80                                   | -1.22, -1.16                                           | -1.03, -0.75                                          | NO                                   | -0.65                                                              | 0.0115          |
| RSPO3        | -4.71                                   | -2.12                                                  | -1.05                                                 | NO                                   | 0.76                                                               | 0.245           |
| EVA1C        | -4.26                                   | -2.20, -2.06                                           | -1.49, -1.91                                          | YES                                  | 0.63                                                               | 6.40E-03        |
| <b>NR4A1</b> | <b>-3.88</b>                            | <b>-1.59, -1.55</b>                                    | <b>-1.1, -0.85</b>                                    | <b>YES</b>                           | <b>1.36</b>                                                        | <b>4.53E-06</b> |
| PON3         | -3.54                                   | -1.17                                                  | -0.6                                                  | YES                                  | -0.09                                                              | 0.87            |
| <b>DUSP4</b> | <b>-3.25</b>                            | <b>-1.48</b>                                           | <b>-0.8</b>                                           | <b>YES</b>                           | <b>2.09</b>                                                        | <b>1.29E-08</b> |
| MTUS1        | -3.19                                   | -1.30                                                  | -1.09                                                 | YES                                  | 0.53                                                               | 7.36E-03        |
| LIMCH1       | -3.13                                   | -1.64                                                  | -1.11                                                 | NO                                   | 0.73                                                               | 4.70E-04        |
| CPLX2        | -3.06                                   | -1.32                                                  | -0.71                                                 | YES                                  | N/A                                                                | N/A             |
| <b>PDE4D</b> | <b>-2.99</b>                            | <b>-1.96</b>                                           | <b>-0.77</b>                                          | <b>YES</b>                           | <b>1.88</b>                                                        | <b>5.00E-12</b> |
| GABRB3       | -2.78                                   | -2.28                                                  | -1.1                                                  | NO                                   | 0.59                                                               | 5.29E-01        |
| <b>AVPI1</b> | <b>-2.64</b>                            | <b>-1.39</b>                                           | <b>-0.76</b>                                          | <b>YES</b>                           | <b>1.17</b>                                                        | <b>3.84E-05</b> |
| GABRA5       | -2.50                                   | -1.52                                                  | -1.08                                                 | NO                                   | N/A                                                                | N/A             |
| NTRK3        | -2.33                                   | -3.21                                                  | -2.4                                                  | NO                                   | N/A                                                                | N/A             |
| THBD         | -2.32                                   | -1.43                                                  | -0.54                                                 | NO                                   | -0.08                                                              | 7.97E-01        |
| DBNDD2       | -2.27                                   | -1.23                                                  | -0.3                                                  | NO                                   | -0.2                                                               | 2.74E-01        |
| SFRP1        | -2.23                                   | -1.53                                                  | -1.07                                                 | NO                                   | 0.17                                                               | 7.42E-01        |
| MGAT5B       | -2.04                                   | -1.54                                                  | -0.93                                                 | NO                                   | N/A                                                                | N/A             |
| CD24         | -1.99                                   | -1.43                                                  | -0.72                                                 | NO                                   | -0.46                                                              | 2.53E-01        |
| FMNL1        | -1.96                                   | -1.42                                                  | -0.91                                                 | NO                                   | 0.29                                                               | 2.10E-01        |
| <b>ID1</b>   | <b>-1.87</b>                            | <b>-1.27</b>                                           | <b>-0.57</b>                                          | <b>YES</b>                           | <b>1.1</b>                                                         | <b>5.27E-04</b> |
| FBN2         | -1.76                                   | -2.90, -1.99                                           | -1.79, -1.56                                          | NO                                   | N/A                                                                | N/A             |
| STC2         | -1.68                                   | -1.09                                                  | -1.18                                                 | NO                                   | 0.3                                                                | 3.65E-01        |
| MMD          | -1.61                                   | -1.38                                                  | -0.83                                                 | NO                                   | -0.61                                                              | 5.25E-02        |
| MFSB3        | -1.60                                   | -1.01                                                  | -0.67                                                 | YES                                  | 0.63                                                               | 0.0113          |
| PDE8A        | -1.51                                   | -1.51, -1.41                                           | -0.82, -0.81                                          | YES                                  | 0.34                                                               | 0.0193          |
| CPEB2        | -1.46                                   | -1.05                                                  | -0.43                                                 | YES                                  | 0.19                                                               | 0.353           |
| SLC40A1      | -1.45                                   | -1.04                                                  | -0.6                                                  | NO                                   | -0.74                                                              | 5.50E-03        |
| ST6GAL2      | -1.39                                   | -2.42                                                  | -1.7                                                  | NO                                   | N/A                                                                | N/A             |
| PMP22        | -1.36                                   | -1.27                                                  | -0.85                                                 | NO                                   | -0.33                                                              | 0.0756          |
| F2RL1        | -1.36                                   | -1.32                                                  | -0.74                                                 | NO                                   | -0.67                                                              | 8.41E-03        |
| SLC16A3      | -1.34                                   | -1.28                                                  | -0.6                                                  | YES                                  | 0.1                                                                | 0.77            |
| TRAPPC5      | -1.32                                   | -1.01                                                  | -0.32                                                 | NO                                   | -0.1                                                               | 0.672           |
| <b>SIK1</b>  | <b>-1.32</b>                            | <b>-1.71</b>                                           | <b>-0.59</b>                                          | <b>YES</b>                           | <b>1.56</b>                                                        | <b>4.95E-10</b> |
| CYB5B1       | -1.30                                   | -1.46                                                  | -0.86                                                 | NO                                   | 0.33                                                               | 0.0886          |
| DENND5B      | -1.29                                   | -1.19                                                  | -0.65                                                 | NO                                   | -0.1                                                               | 0.8             |
| RHOBTB2      | -1.27                                   | -1.38                                                  | -0.5                                                  | NO                                   | 1.05                                                               | 1.56E-04        |
| NPR3         | -1.26                                   | -1.56                                                  | -1.06                                                 | YES                                  | -0.12                                                              | 0.745           |
| NRCAM        | -1.21                                   | -1.46                                                  | -0.96                                                 | NO                                   | -0.61                                                              | 0.0805          |
| GRAMD1A      | -1.16                                   | -1.15                                                  | -0.86                                                 | YES                                  | 0.49                                                               | 7.05E-03        |
| FLYWCH2      | -1.14                                   | -1.07                                                  | -0.69                                                 | NO                                   | 0.08                                                               | 0.625           |
| NPEPL1       | -1.11                                   | -1.03                                                  | -0.6                                                  | NO                                   | 0.33                                                               | 0.0653          |
| CBX4         | -1.11                                   | -1.17                                                  | -0.92                                                 | YES                                  | 0.18                                                               | 0.118           |
| ST3GAL5      | -1.08                                   | -1.09                                                  | -0.54                                                 | YES                                  | 0.04                                                               | 0.918           |
| TGM2         | -1.08                                   | -1.67                                                  | -0.68                                                 | NO                                   | -0.03                                                              | 0.937           |
| C9orf3       | -1.07                                   | -1.30                                                  | -0.92                                                 | YES                                  | 0.05                                                               | 0.795           |
| NDOR1        | -1.05                                   | -1.23                                                  | -0.88                                                 | YES                                  | 0.22                                                               | 0.133           |
| PRTFDC1      | -1.03                                   | -1.56                                                  | -0.57                                                 | YES                                  | 0.1                                                                | 0.735           |
| KHK          | -1.03                                   | -1.09                                                  | -0.28                                                 | NO                                   | 0.23                                                               | 0.327           |

**Fig. S4. Genes regulated by LKB1 at the mRNA level that show LKB1-regulated binding of CRTC2 to their promoters in NSCLC.** RNAseq and ChIPseq experiments were performed in A549-LKB1<sup>WT</sup> and A549-pBabe cells and datasets were cross-referenced. 49 protein-coding genes were identified with mRNA expression and CRTC2 binding log2 fold change below -1. For these 49 candidate genes, presence of canonical CRE sites and mRNA expression in a panel of LKB1-mutant and LKB1-wild type lung adenocarcinoma tumors was also analyzed.

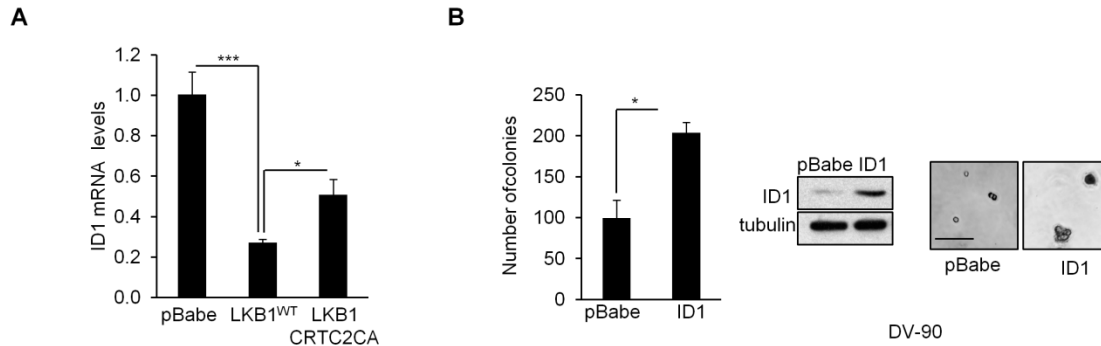

**Fig. S5. ID1 expression is regulated by CRTC2 and promotes anchorage-independent growth in NSCLC cells.** (A) ID1 mRNA levels in A549 cells expressing the pBabe vector, full-length LKB1 (LKB1<sup>WT</sup>) and/or phosphorylation-defective CRTC2 (GFP-CRTC2CA). All values are expressed as means  $\pm$  s.d. \*  $P < 0.05$  \*\*  $P < 0.01$  \*\*\*  $P < 0.001$  determined by ANOVA with Tukeys method. (B) Anchorage-independent growth assessed by soft agar assay in LKB1 wild-type NSCLC DV-90 cells expressing the pBabe vector or full-length ID1. Representative images are shown. Lysates from DV-90 pBabe and DV-90-ID1 cells were immunoblotted with the indicated antibodies. Scale bar= 100  $\mu$ m. All values are expressed as means  $\pm$  s.d.\*  $P < 0.05$  \*\*  $P < 0.01$  \*\*\*  $P < 0.001$  determined by two-sided student t-test.

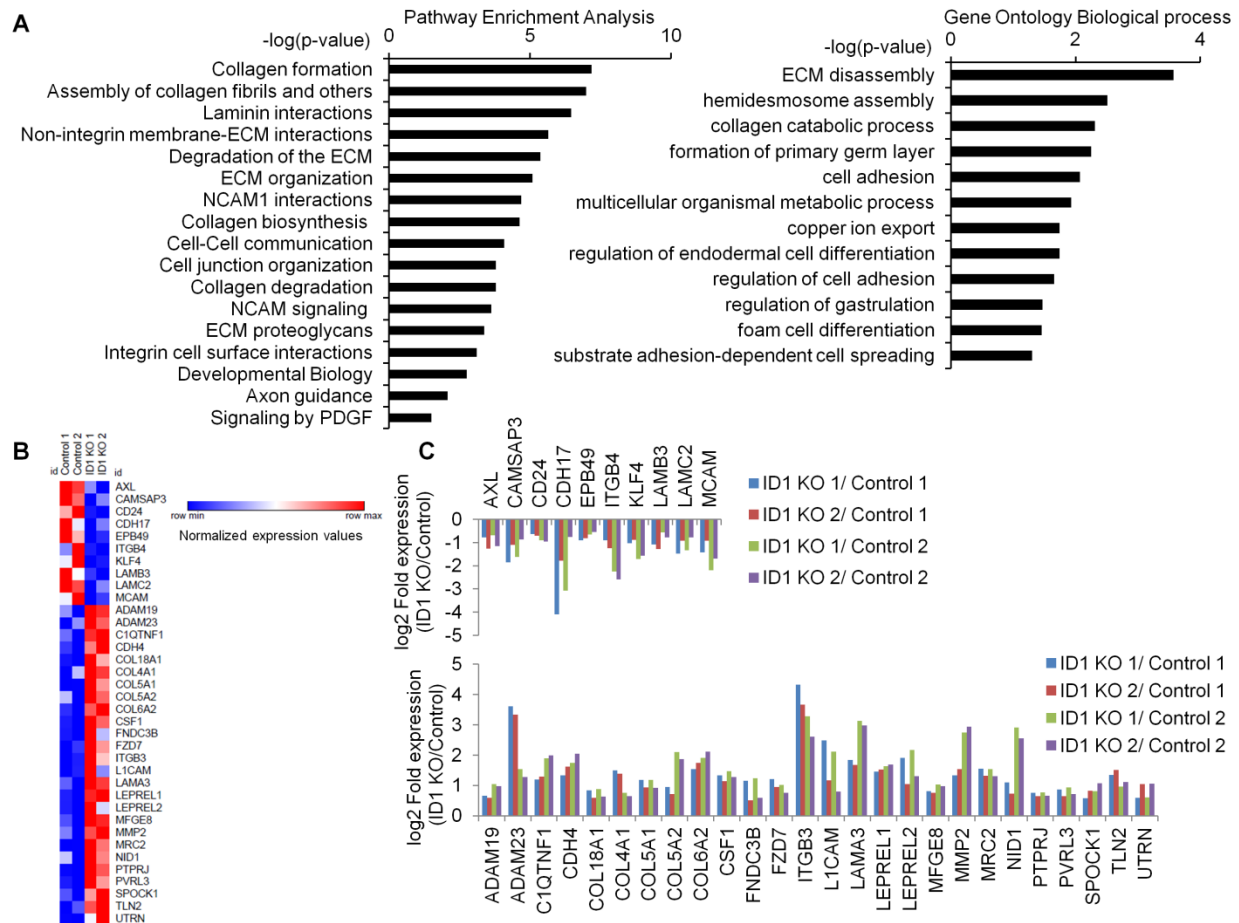

**Fig. S6. Genes and molecular functions regulated by ID1 in NSCLC cells. (A)** Pathway enrichment and Gene Ontology analysis of differentially expressed genes ( $\log_2$  Fold change  $> 0.5$  or  $< -0.5$ ) in A549 ID1-KO (ID1 KO 1, ID1 KO 2) compared to A549 wild type clones (Control 1 and Control 2). **(B)** Heatmap showing differentially expressed genes involved in the regulation of the extracellular matrix, cellular cytoskeleton, cell-cell binding and cellular binding to the extracellular matrix in A549 ID1-KO (ID1 KO 1, ID1 KO 2) compared to A549 wild type (Control 1 and Control 2) clones. **(C)** Log2 Fold expression from the RNA-seq data for each gene in (B).
